# Supplementary material for: Assessing the order of magnitude of outcomes in single-arm cohorts through systematic comparison with corresponding cohorts: An example from the AMOS study
Source: PubMed Central journal article supplement (PMC2323398; doi:10.1186/1471-2288-8-11), 2008-03-19
Supplement: 1471-2288-8-11-S3.pdf [file 1471-2288-8-11-S3.pdf]

## Description of AMOS cohorts and corresponding cohorts, stratified by diagnosis

**Table 1 - Percent women**

| Diagnosis     | AMOS cohorts    |         | Corresponding cohorts |         |                           |
|---------------|-----------------|---------|-----------------------|---------|---------------------------|
|               | N (Women/Total) | Percent | N (Women/Total)       | Percent | N (evaluable/all cohorts) |
| Asthma        | 39 / 56         | 70%     | 1233 / 2030           | 61%     | 12 / 12                   |
| Depression    | 145 / 174       | 83%     | 2796 / 4440           | 63%     | 19 / 19                   |
| Low back pain | 69 / 80         | 86%     | 1777 / 4207           | 42%     | 26 / 30                   |
| Migraine      | 38 / 42         | 90%     | 2684 / 3494           | 77%     | 18 / 21                   |
| Neck pain     | 35 / 40         | 88%     | 407 / 756             | 54%     | 2 / 2                     |
| Total         | 326 / 392       | 83%     | 8897 / 14927          | 60%     | 77 / 84                   |

**Table 2 - Age**

\*of patients \*\*of cohorts

| Diagnosis     | AMOS cohorts |       | Corresponding cohorts |      |                           |
|---------------|--------------|-------|-----------------------|------|---------------------------|
|               | Mean*        | SD*   | Mean**                | SD** | N (evaluable/all cohorts) |
| Asthma        | 43.78        | 11.35 | 47.18                 | 6.72 | 11 / 12                   |
| Depression    | 43.48        | 11.04 | 44.77                 | 5.40 | 17 / 19                   |
| Low back pain | 48.34        | 12.03 | 45.97                 | 4.85 | 27 / 30                   |
| Migraine      | 40.00        | 11.71 | 41.21                 | 2.77 | 19 / 21                   |
| Neck pain     | 45.92        | 11.60 | 46.35                 | 2.78 | 2 / 2                     |
| Total         | 44.39        | 11.62 | 44.70                 | 5.20 | 76 / 84                   |

**Table 3 - Study design of corresponding cohorts**

| Diagnosis     | Randomised controlled trials | Non-randomised comparative studies | Cohort studies | Total    |
|---------------|------------------------------|------------------------------------|----------------|----------|
|               | N (%)                        | N (%)                              | N (%)          | N (%)    |
| Asthma        | 5 (42)                       | 0 (0)                              | 7 (58)         | 12 (100) |
| Depression    | 16 (84)                      | 0 (0)                              | 3 (16)         | 19 (100) |
| Low back pain | 13 (43)                      | 6 (20)                             | 11 (37)        | 30 (100) |
| Migraine      | 4 (19)                       | 3 (14)                             | 14 (67)        | 21 (100) |
| Neck pain     | 2 (100)                      | 0 (0)                              | 0 (0)          | 2 (100)  |
| Total         | 40 (48)                      | 9 (11)                             | 35 (42)        | 84 (100) |

**Table 4 - Setting of corresponding cohorts**

| Diagnosis     | Primary care / Health Maintenance Organization | Non-academic hospital or clinic | Academic hospital or clinic | Other or not specified | Total    |
|---------------|------------------------------------------------|---------------------------------|-----------------------------|------------------------|----------|
|               | N (%)                                          | N (%)                           | N (%)                       | N (%)                  | N (%)    |
| Asthma        | 1 (8)                                          | 4 (33)                          | 5 (42)                      | 2 (17)                 | 12 (100) |
| Depression    | 14 (74)                                        | 4 (21)                          | 0 (0)                       | 1 (5)                  | 19 (100) |
| Low Back Pain | 5 (17)                                         | 9 (30)                          | 12 (40)                     | 4 (13)                 | 30 (100) |
| Migraine      | 6 (29)                                         | 2 (10)                          | 9 (43)                      | 4 (19)                 | 21 (100) |
| Neck pain     | 1 (50)                                         | 0 (0)                           | 1 (50)                      | 0 (0)                  | 2 (100)  |
| Total         | 27 (32)                                        | 19 (23)                         | 27 (32)                     | 11 (13)                | 84 (100) |

**Table 5 - Setting of patients**

\*AMOS patients: setting unknown: n = 3

| Diagnosis     | AMOS patients* |                   |                    |            | Corresponding cohort patients |                                 |                             |                        |             |
|---------------|----------------|-------------------|--------------------|------------|-------------------------------|---------------------------------|-----------------------------|------------------------|-------------|
|               | Primary care   | Referral practice | Out-patient clinic | Total      | Primary care / HMO            | Non-academic hospital or clinic | Academic hospital or clinic | Other or not specified | Total       |
|               | N (%)          | N (%)             | N (%)              | N (%)      | N (%)                         | N (%)                           | N (%)                       | N (%)                  | N (%)       |
| Asthma        | 27 (48)        | 29 (52)           | 0 (0)              | 56 (100)   | 304 (15)                      | 849 (42)                        | 620 (31)                    | 257 (13)               | 2030 (100)  |
| Depression    | 158 (91)       | 8 (5)             | 8 (5)              | 174 (100)  | 3111 (70)                     | 0 (0)                           | 1297 (29)                   | 32 (1)                 | 4440 (100)  |
| Low back pain | 77 (97)        | 1 (1)             | 1 (1)              | 79 (100)   | 857 (18)                      | 1754 (37)                       | 1592 (34)                   | 498 (11)               | 4701 (100)  |
| Migraine      | 36 (88)        | 3 (7)             | 2 (5)              | 41 (100)   | 887 (21)                      | 1139 (27)                       | 81 (2)                      | 2133 (50)              | 4240 (100)  |
| Neck pain     | 39 (100)       | 0 (0)             | 0 (0)              | 39 (100)   | 268 (35)                      | 488 (65)                        | 0 (0)                       | 0 (0)                  | 756 (100)   |
| Total         | 337 (87)       | 41 (11)           | 11 (3)             | 389* (100) | 5427 (34)                     | 4230 (26)                       | 3590 (22)                   | 2920 (18)              | 16167 (100) |

**Table 6 - Disease duration in years at baseline**

\*of patients. \*\*of cohorts

| Diagnosis     | AMOS cohorts |                      | Corresponding cohorts |                       |                           |
|---------------|--------------|----------------------|-----------------------|-----------------------|---------------------------|
|               | Median*      | Interquartile range* | Median**              | Interquartile range** | N (evaluable/all cohorts) |
| Asthma        | 14.50        | 6.00-22.25           | 14.50                 | 10.35-20.01           | 6 / 12                    |
| Depression    | 4.00         | 1.50-10.00           | 16.33                 | 16.33-16.33           | 1 / 19                    |
| Low back pain | 7.00         | 2.00-16.00           | 5.06                  | 3.46-10.00            | 3 / 30                    |
| Migraine      | 12.50        | 6.38-20.00           | 21.33                 | 5.25-21.92            | 3 / 21                    |
| Neck pain     | 4.50         | 0.63-10.00           | 2.32                  | 2.32-2.32             | 1 / 2                     |
| Total         | 6.00         | 2.00-15.75           | 12.08                 | 5.20-20.01            | 14 / 84                   |

**Table 7 - Study treatment in corresponding cohorts**

N and percentages of cohorts

| Diagnosis     | Drugs   | Treatment-as-usual | Surgery | Physiotherapy | Other physical therapy | Educational | Mixed or other | Total    |
|---------------|---------|--------------------|---------|---------------|------------------------|-------------|----------------|----------|
|               | N (%)   | N (%)              | N (%)   | N (%)         | N (%)                  | N (%)       | N (%)          | N (%)    |
| Asthma        | 7 (58)  | 2 (17)             | 0 (0)   | 0 (0)         | 0 (0)                  | 3 (25)      | 0 (0)          | 12 (100) |
| Depression    | 8 (42)  | 3 (16)             | 0 (0)   | 0 (0)         | 0 (0)                  | 2 (11)      | 6 (32)         | 19 (100) |
| Low Back Pain | 2 (7)   | 9 (30)             | 7 (23)  | 3 (10)        | 5 (17)                 | 1 (3)       | 3 (10)         | 30 (100) |
| Migraine      | 15 (71) | 3 (14)             | 0 (0)   | 0 (0)         | 0 (0)                  | 1 (5)       | 2 (7)          | 21 (100) |
| Neck pain     | 0 (0)   | 0 (0)              | 1 (50)  | 1 (50)        | 0 (0)                  | 0 (0)       | 0 (0)          | 2 (100)  |
| Total         | 32 (38) | 17 (20)            | 8 (10)  | 4 (5)         | 5 (7)                  | 7 (8)       | 11 (13)        | 84 (100) |

**Table 8 - Study treatment in corresponding cohort patients**

N and percentages of patients

| Diagnosis     | Drugs     | Treatment-as-usual | Surgery  | Physiotherapy | Other physical therapy | Educational | Mixed or other | Total       |
|---------------|-----------|--------------------|----------|---------------|------------------------|-------------|----------------|-------------|
|               | N (%)     | N (%)              | N (%)    | N (%)         | N (%)                  | N (%)       | N (%)          | N (%)       |
| Asthma        | 1062 (52) | 429 (21)           | 0 (0)    | 0 (0)         | 0 (0)                  | 539 (27)    | 0 (0)          | 2030 (100)  |
| Depression    | 2569 (58) | 352 (8)            | 0 (0)    | 0 (0)         | 0 (0)                  | 323 (7)     | 1196 (27)      | 4440 (100)  |
| Low back pain | 412 (8)   | 1302 (28)          | 961 (20) | 1360 (29)     | 232 (5)                | 50 (1)      | 384 (8)        | 4701 (100)  |
| Migraine      | 3612 (85) | 326 (8)            | 0 (0)    | 0 (0)         | 0 (0)                  | 46 (1)      | 256 (6)        | 4240 (100)  |
| Neck pain     | 0 (0)     | 0 (0)              | 488 (65) | 268 (35)      | 0 (0)                  | 0 (0)       | 0 (0)          | 756 (100)   |
| Total         | 7655 (47) | 2409 (15)          | 1449 (9) | 1628 (10)     | 232 (1)                | 958 (6)     | 1836 (11)      | 16167 (100) |

**Table 9 - Last follow-up of corresponding cohorts**

N and percentages of cohorts. Last follow-up was after 12 months for all A-patients.

| Diagnosis     | 3 Months | 6 Months | 12 Months | Total    |
|---------------|----------|----------|-----------|----------|
|               | N (%)    | N (%)    | N (%)     | N (%)    |
| Asthma        | 3 (25)   | 4 (33)   | 5 (42)    | 12 (100) |
| Depression    | 9 (47)   | 8 (42)   | 2 (11)    | 19 (100) |
| Low Back Pain | 8 (27)   | 8 (27)   | 14 (47)   | 30 (100) |
| Migraine      | 3 (14)   | 12 (57)  | 6 (29)    | 21 (100) |
| Neck pain     | 0 (0)    | 0 (0)    | 2 (100)   | 2 (100)  |
| All           | 23 (27)  | 32 (38)  | 29 (35)   | 84 (100) |

**Table 10 - Follow-up rates**

\*of patients. \*\*of cohorts. Number of evaluable corresponding cohorts at each follow-up: See Table 9

| Diagnosis     | 3 Months      |                         | 6 Months      |                         | 12 Months     |                         |
|---------------|---------------|-------------------------|---------------|-------------------------|---------------|-------------------------|
|               | AMOS cohorts* | Corresponding cohorts** | AMOS cohorts* | Corresponding cohorts** | AMOS cohorts* | Corresponding cohorts** |
| Asthma        | 80.4%         | 58.0%                   | 67.9%         | 70.7%                   | 73.2%         | 73.8%                   |
| Depression    | 87.9%         | 86.4%                   | 85.1%         | 82.1%                   | 78.7%         | 87.0%                   |
| Low Back Pain | 86.3%         | 82.1%                   | 83.8%         | 82.8%                   | 80.0%         | 70.0%                   |
| Migraine      | 90.5%         | 88.1%                   | 78.6%         | 79.6%                   | 73.8%         | 76.1%                   |
| Neck pain     | 95.0%         | Not applicable          | 90.0%         | Not applicable          | 90.0%         | 74.7%                   |
| All           | 87.5%         | 83.0%                   | 82.1%         | 79.1%                   | 78.8%         | 72.2%                   |
