# Supplementary material for: Assessing the order of magnitude of outcomes in single-arm cohorts through systematic comparison with corresponding cohorts: An example from the AMOS study
Source: PubMed Central journal article supplement (PMC2323398; doi:10.1186/1471-2288-8-11), 2008-03-19
Supplement: 1471-2288-8-11-S4.pdf [file 1471-2288-8-11-S4.pdf]

## Comparative analyses, stratified by diagnosis and SF-36 scales

**Table 1 - Asthma: Baseline scores and outcome comparisons of SF-36 scales**

\*of patients. \*\*of cohorts. \*\*\*of differences. N: Number of cohorts. 25-per: 25-percentile. 75-per: 75-percentile. Each outcome difference refers to one SF-36 scale at the last evaluable follow-up of the corresponding cohort: Mean difference from baseline in AMOS cohort minus mean difference from baseline in corresponding cohort. A positive difference indicates that AMOS cohorts show larger improvements than corresponding cohorts.

| SF-36 scale        | Baseline    |         |             |                       |            |          |              | Follow-up           |           |               |               |               |
|--------------------|-------------|---------|-------------|-----------------------|------------|----------|--------------|---------------------|-----------|---------------|---------------|---------------|
|                    | AMOS cohort |         |             | Corresponding cohorts |            |          |              | Outcome differences |           |               |               |               |
|                    | Mean<br>*   | SD<br>* | Median<br>* | N<br>**               | Mean<br>** | SD<br>** | Median<br>** | Mean<br>***         | SD<br>*** | 25-per<br>*** | Median<br>*** | 75-per<br>*** |
| Physical Function  | 73.0        | 24.8    | 78.9        | 9                     | 66.0       | 8.7      | 66.4         | 0.3                 | 7.3       | -5.7          | 0.2           | 5.7           |
| Role Physical      | 53.3        | 41.6    | 50.0        | 9                     | 50.9       | 10.0     | 55.3         | 13.7                | 21.4      | -3.4          | 6.4           | 28.5          |
| Role Emotional     | 72.6        | 35.5    | 100.0       | 9                     | 65.7       | 10.3     | 63.3         | -10.0               | 11.8      | -17.4         | -9.6          | 0.5           |
| Social Functioning | 69.4        | 26.4    | 75.0        | 9                     | 71.5       | 6.1      | 72.1         | 4.9                 | 7.0       | -0.9          | 5.9           | 9.8           |
| Mental Health      | 63.4        | 20.2    | 68.0        | 9                     | 68.0       | 6.3      | 68.3         | 0.8                 | 4.3       | -3.6          | 2.2           | 4.4           |
| Bodily Pain        | 72.2        | 29.8    | 84.0        | 9                     | 67.6       | 6.6      | 67.6         | 1.5                 | 9.7       | -5.8          | 1.6           | 9.4           |
| Vitality           | 45.1        | 17.2    | 40.0        | 9                     | 50.6       | 3.7      | 50.8         | 2.2                 | 7.4       | -2.9          | 1.6           | 8.1           |
| General Health     | 52.5        | 20.0    | 55.0        | 9                     | 49.9       | 6.4      | 51.5         | -2.1                | 6.0       | -8.2          | -2.4          | 4.0           |
| Physical Component | 43.7        | 10.7    | 46.2        | 5                     | 40.9       | 5.5      | 39.7         | 2.1                 | 5.5       | -2.5          | 3.9           | 5.8           |
| Mental Component   | 44.9        | 10.8    | 46.3        | 4                     | 45.3       | 3.0      | 44.4         | 0.8                 | 3.4       | -2.7          | 1.5           | 3.7           |

**Table 2 - Depression: Baseline scores and outcome comparisons of SF-36 scales**

\*of patients. \*\*of cohorts. \*\*\*of differences. N: Number of cohorts. 25-per: 25-percentile. 75-per: 75-percentile. Each outcome difference refers to one SF-36 scale at the last evaluable follow-up of the corresponding cohort: Mean difference from baseline in AMOS cohort minus mean difference from baseline in corresponding cohort. A positive difference indicates that AMOS cohorts show larger improvements than corresponding cohorts.

| SF-36 scale        | Baseline    |         |             |                       |            |          |              | Follow-up           |           |               |               |               |
|--------------------|-------------|---------|-------------|-----------------------|------------|----------|--------------|---------------------|-----------|---------------|---------------|---------------|
|                    | AMOS cohort |         |             | Corresponding cohorts |            |          |              | Outcome differences |           |               |               |               |
|                    | Mean<br>*   | SD<br>* | Median<br>* | N<br>**               | Mean<br>** | SD<br>** | Median<br>** | Mean<br>***         | SD<br>*** | 25-per<br>*** | Median<br>*** | 75-per<br>*** |
| Physical Function  | 75.4        | 22.6    | 80.0        | 8                     | 72.7       | 17.3     | 74.8         | 4.8                 | 9.8       | -0.1          | 1.9           | 6.2           |
| Role Physical      | 34.0        | 37.2    | 25.0        | 7                     | 53.0       | 8.6      | 50.0         | 13.2                | 6.8       | 8.8           | 11.3          | 16.0          |
| Role Emotional     | 24.0        | 32.0    | 0.0         | 8                     | 31.0       | 15.3     | 27.0         | 3.8                 | 10.8      | -4.2          | 4.5           | 10.5          |
| Social Functioning | 44.5        | 22.5    | 43.8        | 14                    | 48.8       | 7.8      | 50.1         | 1.3                 | 8.8       | -3.7          | -0.4          | 8.2           |
| Mental Health      | 38.1        | 16.5    | 36.0        | 9                     | 42.2       | 3.2      | 42.9         | -0.4                | 10.1      | -10.3         | 3.4           | 9.7           |
| Bodily Pain        | 52.4        | 28.6    | 41.0        | 8                     | 58.9       | 9.9      | 58.6         | 6.6                 | 6.4       | 2.0           | 3.7           | 10.3          |
| Vitality           | 26.4        | 15.5    | 25.0        | 8                     | 29.9       | 6.7      | 29.9         | 0.3                 | 10.7      | -8.3          | 0.0           | 10.9          |
| General Health     | 44.1        | 19.7    | 45.0        | 10                    | 57.6       | 10.4     | 60.1         | 2.8                 | 3.3       | -0.1          | 2.2           | 5.1           |
| Physical Component | 44.0        | 10.4    | 42.5        | 5                     | 42.5       | 6.6      | 47.0         | 4.4                 | 1.7       | 3.2           | 3.5           | 6.0           |
| Mental Component   | 27.8        | 9.5     | 26.2        | 8                     | 29.3       | 8.7      | 28.3         | -1.0                | 7.6       | -7.6          | -3.5          | 6.1           |

**Table 3 - Low back pain: Baseline scores and outcome comparisons of SF-36 scales**

\*of patients. \*\*of cohorts. \*\*\*of differences. N: Number of cohorts. 25-per: 25-percentile. 75-per: 75-percentile. Each outcome difference refers to one SF-36 scale at the last evaluable follow-up of the corresponding cohort: Mean difference from baseline in AMOS cohort minus mean difference from baseline in corresponding cohort. A positive difference indicates that AMOS cohorts show larger improvements than corresponding cohorts.

| SF-36 scale        | Baseline    |         |             |                       |            |          |              | Follow-up           |           |               |               |               |
|--------------------|-------------|---------|-------------|-----------------------|------------|----------|--------------|---------------------|-----------|---------------|---------------|---------------|
|                    | AMOS cohort |         |             | Corresponding cohorts |            |          |              | Outcome differences |           |               |               |               |
|                    | Mean<br>*   | SD<br>* | Median<br>* | N<br>**               | Mean<br>** | SD<br>** | Median<br>** | Mean<br>***         | SD<br>*** | 25-per<br>*** | Median<br>*** | 75-per<br>*** |
| Physical Function  | 60.9        | 22.9    | 65.0        | 26                    | 47.6       | 12.6     | 44.8         | -1.8                | 12.4      | -7.8          | 0.6           | 7.6           |
| Role Physical      | 28.8        | 34.9    | 25.0        | 24                    | 22.5       | 12.3     | 20.1         | 2.8                 | 11.3      | -6.1          | 5.4           | 12.0          |
| Role Emotional     | 49.4        | 42.4    | 33.3        | 23                    | 56.3       | 12.1     | 57.0         | 0.0                 | 10.2      | -4.3          | -2.0          | 8.9           |
| Social Functioning | 60.3        | 24.5    | 62.5        | 24                    | 57.4       | 12.6     | 56.9         | -0.7                | 8.8       | -8.5          | 1.9           | 5.4           |
| Mental Health      | 55.5        | 18.7    | 56.0        | 25                    | 62.5       | 6.5      | 63.4         | 2.1                 | 7.2       | -0.5          | 2.3           | 5.5           |
| Bodily Pain        | 32.1        | 18.5    | 32.0        | 28                    | 32.1       | 9.1      | 31.1         | -0.6                | 12.0      | -9.9          | 1.7           | 6.1           |
| Vitality           | 36.5        | 15.7    | 35.0        | 24                    | 43.2       | 5.3      | 42.6         | 3.7                 | 6.0       | -0.8          | 4.5           | 8.7           |
| General Health     | 50.7        | 19.1    | 50.0        | 25                    | 60.0       | 8.8      | 59.9         | 5.3                 | 4.0       | 2.3           | 5.4           | 8.9           |
| Physical Component | 35.5        | 8.3     | 35.1        | 9                     | 29.1       | 3.6      | 28.5         | 1.0                 | 4.5       | -2.2          | 2.7           | 5.1           |
| Mental Component   | 41.3        | 11.1    | 42.4        | 10                    | 43.7       | 6.9      | 43.4         | 0.0                 | 2.8       | -2.2          | -0.5          | 1.8           |

**Table 4 - Migraine: Baseline scores and outcome comparisons of SF-36 scales**

\*of patients. \*\*of cohorts. \*\*\*of differences. N: Number of cohorts. 25-per: 25-percentile. 75-per: 75-percentile. Each outcome difference refers to one SF-36 scale at the last evaluable follow-up of the corresponding cohort: Mean difference from baseline in AMOS cohort minus mean difference from baseline in corresponding cohort. A positive difference indicates that AMOS cohorts show larger improvements than corresponding cohorts.

| SF-36 scale        | Baseline    |         |             |                       |            |          |              | Follow-up           |           |               |               |               |
|--------------------|-------------|---------|-------------|-----------------------|------------|----------|--------------|---------------------|-----------|---------------|---------------|---------------|
|                    | AMOS cohort |         |             | Corresponding cohorts |            |          |              | Outcome differences |           |               |               |               |
|                    | Mean<br>*   | SD<br>* | Median<br>* | N<br>**               | Mean<br>** | SD<br>** | Median<br>** | Mean<br>***         | SD<br>*** | 25-per<br>*** | Median<br>*** | 75-per<br>*** |
| Physical Function  | 82.3        | 22.3    | 95.0        | 18                    | 85.9       | 4.0      | 85.2         | 2.4                 | 1.9       | 1.1           | 2.6           | 3.9           |
| Role Physical      | 42.9        | 39.2    | 50.0        | 18                    | 51.3       | 13.3     | 55.8         | -3.0                | 11.3      | -12.3         | -4.3          | 5.6           |
| Role Emotional     | 58.7        | 44.1    | 66.7        | 18                    | 71.2       | 8.8      | 72.1         | 1.8                 | 10.5      | -7.4          | -0.5          | 9.4           |
| Social Functioning | 55.4        | 20.5    | 56.3        | 18                    | 69.4       | 6.5      | 69.3         | 6.6                 | 9.8       | -0.1          | 6.1           | 17.2          |
| Mental Health      | 56.4        | 19.5    | 58.0        | 18                    | 67.3       | 7.5      | 67.2         | 3.1                 | 4.8       | -0.4          | 0.5           | 7.0           |
| Bodily Pain        | 41.5        | 19.9    | 41.0        | 18                    | 50.6       | 8.9      | 51.0         | 6.6                 | 6.4       | 0.1           | 6.9           | 11.6          |
| Vitality           | 41.7        | 18.4    | 40.0        | 18                    | 53.2       | 5.8      | 51.6         | 4.6                 | 6.0       | 0.1           | 3.6           | 9.7           |
| General Health     | 55.6        | 19.7    | 55.0        | 18                    | 67.2       | 7.4      | 67.3         | 1.6                 | 6.0       | -3.9          | 2.2           | 6.8           |
| Physical Component | 42.5        | 8.9     | 43.3        | 7                     | 42.0       | 4.4      | 41.0         | 0.6                 | 1.6       | 0.1           | 0.8           | 1.5           |
| Mental Component   | 39.8        | 12.1    | 43.2        | 7                     | 45.4       | 4.4      | 46.4         | 2.3                 | 5.2       | -2.8          | 3.1           | 5.6           |

**Table 5 - Neck pain: Baseline scores and outcome comparisons of SF-36 scales**

\*of patients. \*\*of cohorts. \*\*\*of differences. N: Number of cohorts. 25-per: 25-percentile. 75-per: 75-percentile. Each outcome difference refers to one SF-36 scale at the last evaluable follow-up of the corresponding cohort: Mean difference from baseline in AMOS cohort minus mean difference from baseline in corresponding cohort. A positive difference indicates that AMOS cohorts show larger improvements than corresponding cohorts.

| SF-36 scale        | Baseline    |         |             |                       |            |          |              | Follow-up           |           |               |               |               |
|--------------------|-------------|---------|-------------|-----------------------|------------|----------|--------------|---------------------|-----------|---------------|---------------|---------------|
|                    | AMOS cohort |         |             | Corresponding cohorts |            |          |              | Outcome differences |           |               |               |               |
|                    | Mean<br>*   | SD<br>* | Median<br>* | N<br>**               | Mean<br>** | SD<br>** | Median<br>** | Mean<br>***         | SD<br>*** | 25-per<br>*** | Median<br>*** | 75-per<br>*** |
| Physical Function  | 74.8        | 23.4    | 85.0        | 1                     | 76.2       | -        | 76.2         | 0.2                 | -         | 0.2           | 0.2           | 0.2           |
| Role Physical      | 41.9        | 39.4    | 25.0        | 1                     | 67.7       | -        | 67.7         | 11.8                | -         | 11.8          | 11.8          | 11.8          |
| Role Emotional     | 48.3        | 44.6    | 50.0        | 1                     | 78.2       | -        | 78.2         | 17.2                | -         | 17.2          | 17.2          | 17.2          |
| Social Functioning | 68.1        | 20.0    | 68.8        | 1                     | 72.9       | -        | 72.9         | 9.4                 | -         | 9.4           | 9.4           | 9.4           |
| Mental Health      | 58.2        | 20.2    | 56.0        | 1                     | 70.0       | -        | 70.0         | 9.5                 | -         | 9.5           | 9.5           | 9.5           |
| Bodily Pain        | 41.9        | 19.7    | 41.0        | 1                     | 44.6       | -        | 44.6         | 7.8                 | -         | 7.8           | 7.8           | 7.8           |
| Vitality           | 40.8        | 18.3    | 40.0        | 1                     | 49.7       | -        | 49.7         | 9.7                 | -         | 9.7           | 9.7           | 9.7           |
| General Health     | 48.9        | 19.1    | 48.5        | 1                     | 66.6       | -        | 66.6         | 10.7                | -         | 10.7          | 10.7          | 10.7          |
| Physical Component | 40.4        | 8.7     | 40.9        | 1                     | 34.5       | -        | 34.5         | -4.2                | -         | -4.2          | -4.2          | -4.2          |
| Mental Component   | 41.0        | 12.4    | 40.7        | 1                     | 42.9       | -        | 42.9         | -3.1                | -         | -3.1          | -3.1          | -3.1          |
